# Supplementary material for: Effect of a Wood-Based Carrier of Trichoderma atroviride SC1 on the Microorganisms of the Soil
Source: MDPI journal article supplement (doi:10.3390/jof7090751), 2021-09-13
Supplement: s1 [file s1]

Fig. S1

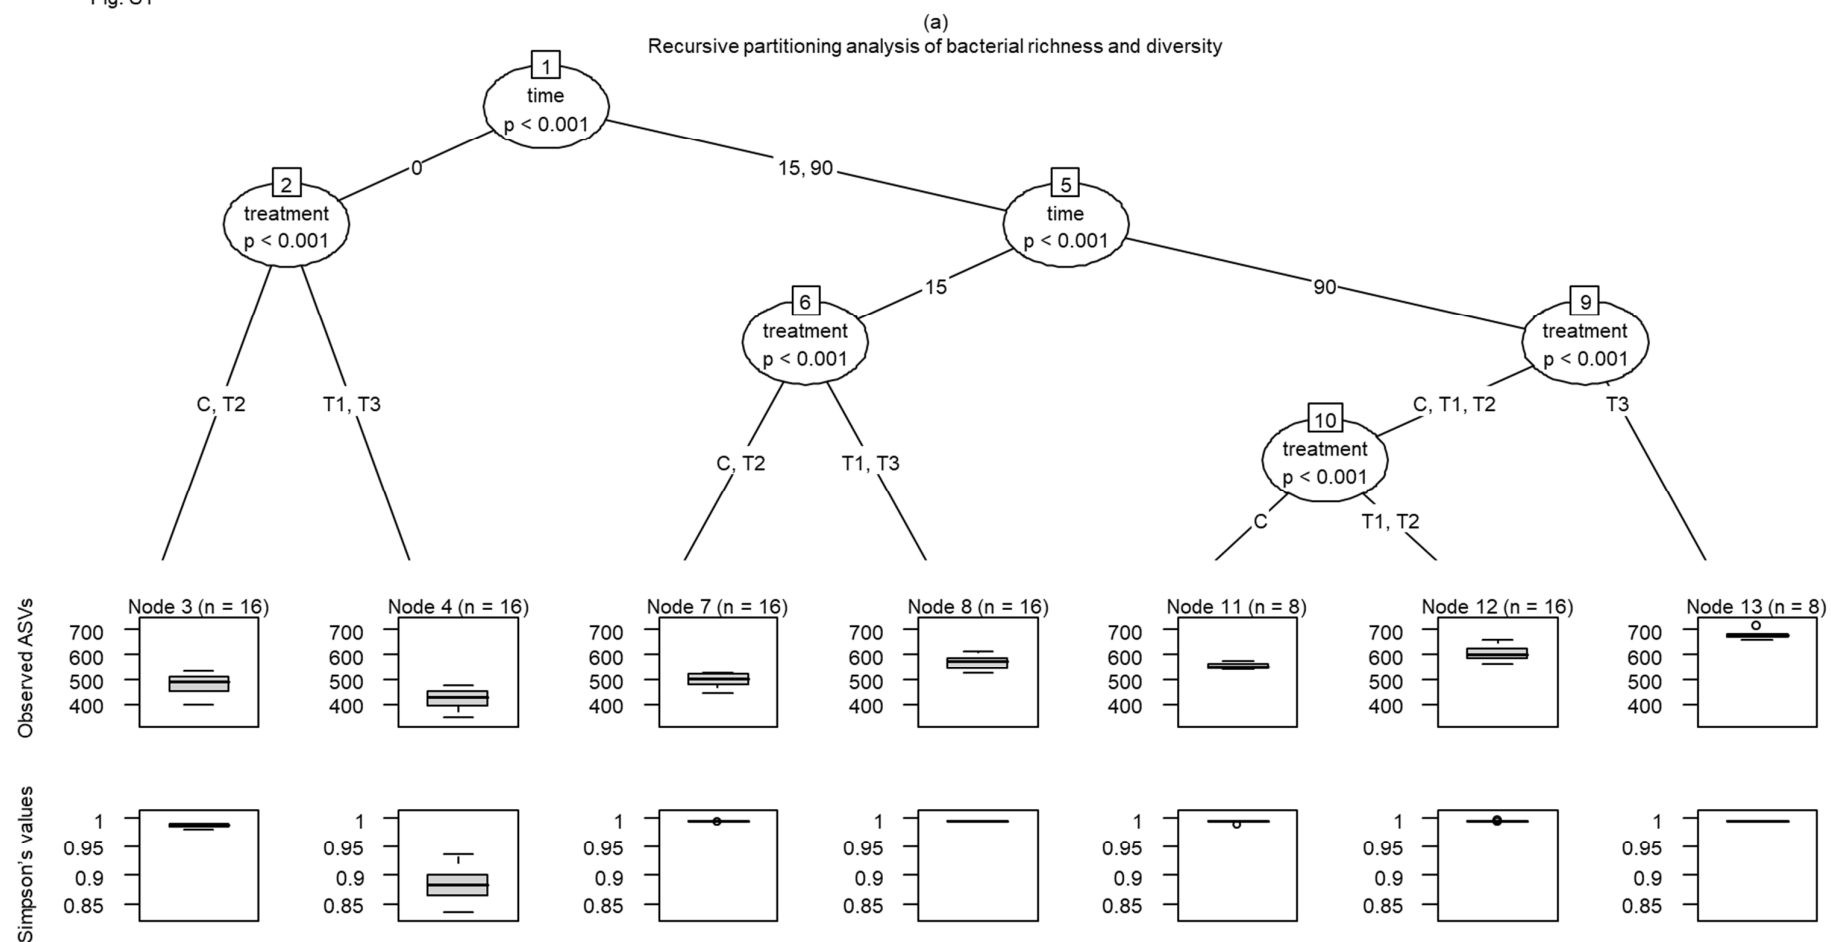

(b)  
Recursive partitioning analysis of fungal richness and diversity

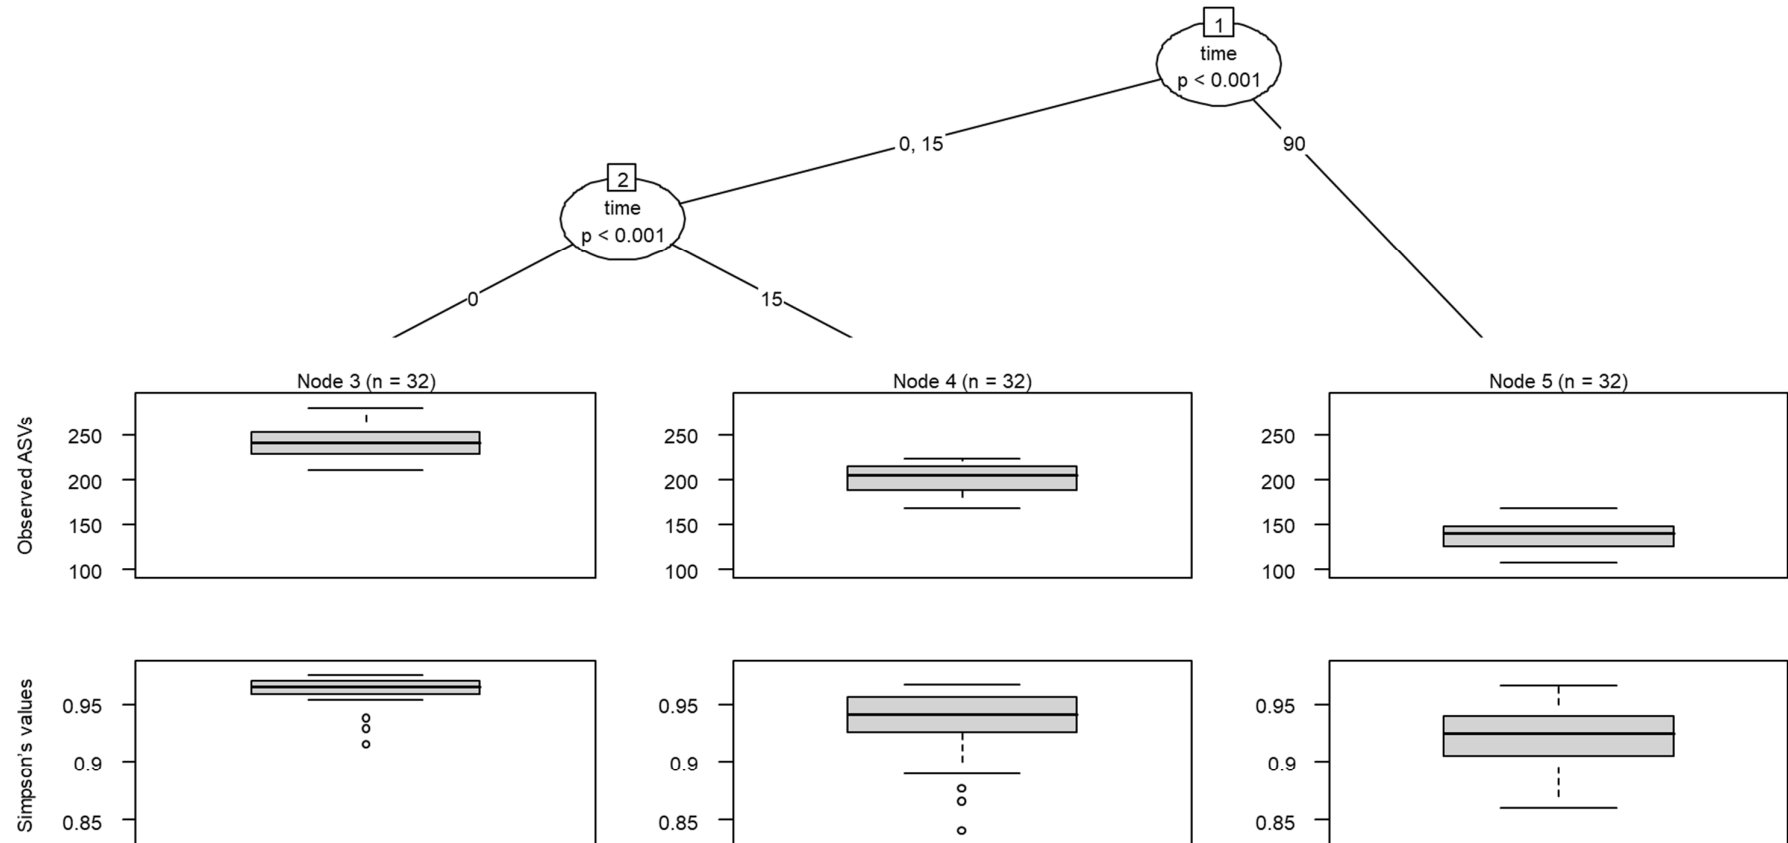

Figure S1: Recursive partitioning analysis of bacterial (a) and fungal (b) richness and diversity
